# Supplementary material for: Long-term follow-up in an open-label trial of triheptanoin in GLUT1 deficiency syndrome: a sustained dramatic effect
Source: PubMed Central journal article supplement — J Neurol Neurosurg Psychiatry. 2019 Apr 4;90(11):1291–3. doi: 10.1136/jnnp-2018-320283 (PMC6860903; doi:10.1136/jnnp-2018-320283), 2019-04-04
Supplement: jnnp-2018-320283supp001.pdf [file jnnp-2018-320283supp001.pdf]

**Supplementary Table e1:** Changes in primary and secondary outcome variables. Number of total and motor paroxysmal events are expressed per month. Values are mean and standard deviation between brackets. Wilcoxon test for the difference in changes on each treatment. Abbreviations: CGI-S = Clinical Global Impression-Severity scale.

| Variable                                  | Baseline    | Treatment  | Withdrawal    | Resumption short term | Resumption mid term | 2 <sup>nd</sup> year follow-up | 3 <sup>rd</sup> year follow-up | <i>p value (Friedman)</i> |
|-------------------------------------------|-------------|------------|---------------|-----------------------|---------------------|--------------------------------|--------------------------------|---------------------------|
| <b>Total events</b>                       | 16.5 (15.2) | 1.0(1.2)   | 13.4 (11.7)   | 4.1 (2.3)             | 1.0 (1.3)           | 0.8 (0.9)                      | 0.4(0.5)                       | <b>0.003</b>              |
| <b>Motor events</b>                       | 8.3 (10.7)  | 0.6(0.7)   | 6.6 (8.1)     | 2.6 (2.0)             | 0.6 (1.2)           | 0.6 (0.8)                      | 0.3(0.4)                       | <b>0.004</b>              |
| <b>Duration of total events (minutes)</b> | 85.6 (31.3) | 46.8(66.8) | 133.1 (176.6) | 55.5 (47.7)           | 88.1 (72.2)         | 31.1 (30.3)                    | 16.1 (24.9)                    | 0.069                     |
| <b>CGI-S</b>                              | 4.4 (0.5)   | 3.6(0.9)   | 4.2 (0.8)     | 4.2 (0.8)             | 3.6 (0.5)           | 3.4 (0.9)                      | 3(1)                           | 0.135                     |
